# Supplementary material for: Synthesis, Characterization, and Thin-Film Transistor Response of Benzo[i]pentahelicene-3,6-dione
Source: MDPI journal article supplement (doi:10.3390/molecules27030863), 2022-01-27
Supplement: s1 [file s1]

# Synthesis, characterization, and thin-film transistor response of benzo[i]pentahelicene-3,6-dione

Maria Paola Bracciale<sup>1,\*</sup>, Guhyun Kwon,<sup>2</sup> Dongil Ho,<sup>2</sup> Choongik Kim,<sup>2</sup> Maria Laura Santarelli,<sup>1</sup> and Assunta Marrocchi<sup>3,\*</sup>

---

*Department of Chemical Engineering Materials and Environment, University of Rome "Sapienza", Via Eudossiana 18, 00184 Rome, Italy; mariapaola.bracciale@uniroma1.it (M.P.B.); marialaura.santarelli@uniroma1.it (M.L.S.)*

*Department of Chemical and Biomolecular Engineering, Sogang University, Seoul 04107, Korea; choongik@sogang.ac.kr (C.K.); hdnel@naver.com (D. H.) kguhyun1119@nate.com (G. K.)*

*Department of Chemistry, Biology and Biotechnology University of Perugia, Via Elce di Sotto 8, 06123 Perugia, Italy; assunta.marrocchi@unipg.it (A.M.)*

**Table S1** Fractional Atomic Coordinates ( $\times 10^4$ ) and Equivalent Isotropic Displacement Parameters ( $\text{\AA}^2 \times 10^3$ ) for compound **1**.  $U_{\text{eq}}$  is defined as 1/3 of the trace of the orthogonalised  $U_{ij}$  tensor.

| Atom | <i>x</i>    | <i>y</i>   | <i>z</i>  | <i>U</i> (eq) |
|------|-------------|------------|-----------|---------------|
| O1   | 5087.5(9)   | -650.0(16) | 1132.6(3) | 21.0(3)       |
| O2   | 7606.6(9)   | 2483.8(17) | 139.0(3)  | 23.5(3)       |
| C1   | 6871.3(12)  | 548(2)     | 1003.2(4) | 12.9(3)       |
| C2   | 5682.2(12)  | 180(2)     | 923.2(4)  | 15.8(3)       |
| C3   | 5245.5(13)  | 726(2)     | 566.1(5)  | 20.7(3)       |
| C4   | 5896.8(13)  | 1347(2)    | 305.3(4)  | 20.2(3)       |
| C5   | 7082.8(13)  | 1628(2)    | 366.6(4)  | 16.4(3)       |
| C6   | 7572.1(12)  | 978(2)     | 715.9(4)  | 13.0(3)       |
| C7   | 8737.5(12)  | 761.4(19)  | 761.4(4)  | 13.1(3)       |
| C8   | 9496.5(13)  | 903(2)     | 462.8(4)  | 15.7(3)       |
| C9   | 10569.9(13) | 443(2)     | 501.8(4)  | 17.3(3)       |
| C10  | 10963.4(12) | -344(2)    | 829.3(4)  | 15.4(3)       |
| C11  | 12041.2(13) | -1056(2)   | 853.0(4)  | 20.3(3)       |
| C12  | 12395.1(13) | -1904(2)   | 1160.5(5) | 22.6(4)       |
| C13  | 11666.9(13) | -2158(2)   | 1452.1(4) | 20.8(3)       |
| C14  | 10619.1(12) | -1469(2)   | 1439.3(4) | 16.3(3)       |
| C15  | 10249.0(11) | -475(2)    | 1134.1(4) | 13.2(3)       |
| C16  | 9151.2(11)  | 284.7(19)  | 1109.5(4) | 12.0(3)       |
| C17  | 8449.9(12)  | 540(2)     | 1421.6(4) | 12.4(3)       |
| C18  | 8860.6(12)  | 999(2)     | 1782.5(4) | 13.6(3)       |
| C19  | 9921.3(13)  | 1721(2)    | 1843.2(4) | 16.8(3)       |
| C20  | 10254.6(13) | 2241(2)    | 2184.0(4) | 20.3(3)       |
| C21  | 9549.5(14)  | 2051(2)    | 2484.9(4) | 24.1(4)       |
| C22  | 8508.3(14)  | 1415(2)    | 2434.1(4) | 21.7(4)       |
| C23  | 8130.4(13)  | 940(2)     | 2082.4(4) | 16.5(3)       |
| C24  | 7000.0(13)  | 558(2)     | 2021.4(4) | 17.8(3)       |
| C25  | 6589.5(12)  | 410(2)     | 1680.3(4) | 16.2(3)       |
| C26  | 7298.3(11)  | 450(2)     | 1367.3(4) | 13.0(3)       |

**Table S2** Anisotropic Displacement Parameters ( $\text{\AA}^2 \times 10^3$ ) for compound **1**. The Anisotropic displacement factor exponent takes the form:  $-2\pi^2[h^2a^{*2}U_{11}+\dots+2hka \times b \times U_{12}]$

| Atom | U <sub>11</sub> | U <sub>22</sub> | U <sub>33</sub> | U <sub>23</sub> | U <sub>13</sub> | U <sub>12</sub> |
|------|-----------------|-----------------|-----------------|-----------------|-----------------|-----------------|
| O1   | 14.6(5)         | 20.9(6)         | 27.5(6)         | -1.0(5)         | 2.2(5)          | -2.1(5)         |
| O2   | 26.0(6)         | 26.7(6)         | 17.7(5)         | 6.5(5)          | -2.0(5)         | 0.4(5)          |
| C1   | 12.8(7)         | 9.4(7)          | 16.4(7)         | -1.1(6)         | -0.8(5)         | 1.0(6)          |
| C2   | 13.0(7)         | 11.3(7)         | 23.0(7)         | -3.0(6)         | -0.2(6)         | 2.3(6)          |
| C3   | 15.7(7)         | 18.6(8)         | 27.8(8)         | -2.0(7)         | -7.8(6)         | 1.4(6)          |
| C4   | 21.8(8)         | 17.8(8)         | 21.1(8)         | 0.6(6)          | -9.7(6)         | 2.2(6)          |
| C5   | 21.1(8)         | 13.0(7)         | 15.2(7)         | -2.2(6)         | -2.4(6)         | 2.6(6)          |
| C6   | 15.2(7)         | 10.4(7)         | 13.5(7)         | -1.8(6)         | -1.3(6)         | -0.8(5)         |
| C7   | 14.6(7)         | 11.1(7)         | 13.6(7)         | -1.4(5)         | 0.2(6)          | -1.8(5)         |
| C8   | 18.3(7)         | 17.4(8)         | 11.4(7)         | -0.3(6)         | 0.5(6)          | -3.2(6)         |
| C9   | 18.9(7)         | 18.0(8)         | 15.0(7)         | -2.8(6)         | 5.7(6)          | -4.5(6)         |
| C10  | 13.1(7)         | 15.6(7)         | 17.6(7)         | -4.9(6)         | 0.9(5)          | -3.5(6)         |
| C11  | 13.4(7)         | 22.2(8)         | 25.1(8)         | -7.1(7)         | 5.0(6)          | -2.1(6)         |
| C12  | 13.9(7)         | 21.9(9)         | 31.9(9)         | -8.8(7)         | -2.9(7)         | 4.1(6)          |
| C13  | 20.6(8)         | 18.1(8)         | 23.6(8)         | -2.0(6)         | -5.9(6)         | 4.0(6)          |
| C14  | 16.6(7)         | 14.1(7)         | 18.1(7)         | -2.1(6)         | -0.3(6)         | 0.3(6)          |
| C15  | 12.0(7)         | 12.4(7)         | 15.2(7)         | -3.5(6)         | 0.3(5)          | -2.8(6)         |
| C16  | 12.5(7)         | 9.8(7)          | 13.7(7)         | 0.2(5)          | 0.1(5)          | -2.0(5)         |
| C17  | 15.4(7)         | 9.9(7)          | 11.9(7)         | 0.4(5)          | 0.3(5)          | -0.2(5)         |
| C18  | 17.6(7)         | 11.2(7)         | 11.9(7)         | 0.2(5)          | -0.8(5)         | 3.4(6)          |
| C19  | 18.6(7)         | 15.2(7)         | 16.5(7)         | -1.3(6)         | -1.5(6)         | 3.0(6)          |
| C20  | 20.5(8)         | 19.7(8)         | 20.7(8)         | -3.5(7)         | -6.3(6)         | 3.9(7)          |
| C21  | 30.6(9)         | 27.3(9)         | 14.5(7)         | -5.1(7)         | -6.8(6)         | 10.6(7)         |
| C22  | 28.5(9)         | 24.8(9)         | 11.8(7)         | -0.3(6)         | 2.0(6)          | 8.0(7)          |
| C23  | 21.5(8)         | 14.3(7)         | 13.8(7)         | 1.4(6)          | 0.9(6)          | 3.5(6)          |
| C24  | 21.0(8)         | 15.4(8)         | 17.0(7)         | 0.9(6)          | 8.1(6)          | 2.8(6)          |
| C25  | 14.4(7)         | 14.2(7)         | 20.0(7)         | 0.3(6)          | 4.1(6)          | 0.8(6)          |
| C26  | 14.3(7)         | 8.9(7)          | 15.7(7)         | -0.6(6)         | 0.9(5)          | 0.4(5)          |

**Table S3** Bond Lengths for compound **1**.

| Atom | Atom | Length/Å   | Atom | Atom | Length/Å   |
|------|------|------------|------|------|------------|
| O1   | C2   | 1.2218(19) | C12  | C13  | 1.402(2)   |
| O2   | C5   | 1.2272(19) | C13  | C14  | 1.374(2)   |
| C1   | C2   | 1.501(2)   | C14  | C15  | 1.414(2)   |
| C1   | C6   | 1.393(2)   | C15  | C16  | 1.452(2)   |
| C1   | C26  | 1.4355(19) | C16  | C17  | 1.4406(19) |
| C2   | C3   | 1.471(2)   | C17  | C18  | 1.4561(19) |
| C3   | C4   | 1.325(2)   | C17  | C26  | 1.416(2)   |
| C4   | C5   | 1.475(2)   | C18  | C19  | 1.414(2)   |
| C5   | C6   | 1.493(2)   | C18  | C23  | 1.415(2)   |
| C6   | C7   | 1.437(2)   | C19  | C20  | 1.370(2)   |
| C7   | C8   | 1.437(2)   | C20  | C21  | 1.405(2)   |
| C7   | C16  | 1.4179(19) | C21  | C22  | 1.364(2)   |
| C8   | C9   | 1.357(2)   | C22  | C23  | 1.415(2)   |
| C9   | C10  | 1.419(2)   | C23  | C24  | 1.422(2)   |
| C10  | C11  | 1.416(2)   | C24  | C25  | 1.352(2)   |
| C10  | C15  | 1.420(2)   | C25  | C26  | 1.4369(19) |
| C11  | C12  | 1.362(2)   |      |      |            |

**Table S4** Bond Angles for compound **1**.

| Atom | Atom | Atom | Angle/°    | Atom | Atom | Atom | Angle/°    |
|------|------|------|------------|------|------|------|------------|
| C6   | C1   | C2   | 118.91(13) | C13  | C14  | C15  | 121.06(14) |
| C6   | C1   | C26  | 119.65(13) | C10  | C15  | C16  | 119.17(13) |
| C26  | C1   | C2   | 121.44(13) | C14  | C15  | C10  | 117.71(13) |
| O1   | C2   | C1   | 122.63(14) | C14  | C15  | C16  | 122.95(13) |
| O1   | C2   | C3   | 119.02(14) | C7   | C16  | C15  | 118.62(13) |
| C3   | C2   | C1   | 118.18(13) | C7   | C16  | C17  | 118.25(13) |
| C4   | C3   | C2   | 121.54(14) | C17  | C16  | C15  | 123.11(13) |
| C3   | C4   | C5   | 121.60(14) | C16  | C17  | C18  | 123.41(13) |
| O2   | C5   | C4   | 118.49(14) | C26  | C17  | C16  | 117.89(13) |
| O2   | C5   | C6   | 122.97(14) | C26  | C17  | C18  | 118.58(13) |
| C4   | C5   | C6   | 118.38(13) | C19  | C18  | C17  | 123.01(13) |
| C1   | C6   | C5   | 118.66(13) | C19  | C18  | C23  | 117.51(13) |
| C1   | C6   | C7   | 119.38(13) | C23  | C18  | C17  | 119.00(13) |
| C7   | C6   | C5   | 121.95(13) | C20  | C19  | C18  | 121.34(15) |
| C6   | C7   | C8   | 122.51(13) | C19  | C20  | C21  | 120.56(15) |
| C16  | C7   | C6   | 118.87(13) | C22  | C21  | C20  | 119.59(14) |
| C16  | C7   | C8   | 118.51(13) | C21  | C22  | C23  | 120.83(15) |
| C9   | C8   | C7   | 121.31(14) | C18  | C23  | C24  | 119.40(14) |
| C8   | C9   | C10  | 121.13(14) | C22  | C23  | C18  | 119.86(14) |
| C9   | C10  | C15  | 119.27(13) | C22  | C23  | C24  | 120.50(14) |
| C11  | C10  | C9   | 121.16(14) | C25  | C24  | C23  | 121.28(14) |
| C11  | C10  | C15  | 119.52(14) | C24  | C25  | C26  | 121.12(14) |
| C12  | C11  | C10  | 121.05(15) | C1   | C26  | C25  | 121.88(13) |
| C11  | C12  | C13  | 119.65(15) | C17  | C26  | C1   | 119.11(13) |
| C14  | C13  | C12  | 120.69(15) | C17  | C26  | C25  | 118.81(13) |

**Table S5** Torsion Angles for compound **1**.

| A   | B   | C   | D   | Angle/°     | A   | B   | C   | D   | Angle/°     |
|-----|-----|-----|-----|-------------|-----|-----|-----|-----|-------------|
| O1  | C2  | C3  | C4  | -168.27(16) | C11 | C12 | C13 | C14 | -3.7(2)     |
| O2  | C5  | C6  | C1  | 159.65(15)  | C12 | C13 | C14 | C15 | -0.5(2)     |
| O2  | C5  | C6  | C7  | -21.3(2)    | C13 | C14 | C15 | C10 | 5.2(2)      |
| C1  | C2  | C3  | C4  | 7.2(2)      | C13 | C14 | C15 | C16 | -179.69(14) |
| C1  | C6  | C7  | C8  | 170.00(14)  | C14 | C15 | C16 | C7  | -160.89(14) |
| C1  | C6  | C7  | C16 | -6.2(2)     | C14 | C15 | C16 | C17 | 17.6(2)     |
| C2  | C1  | C6  | C5  | 19.2(2)     | C15 | C10 | C11 | C12 | 1.6(2)      |
| C2  | C1  | C6  | C7  | -159.90(13) | C15 | C16 | C17 | C18 | 33.7(2)     |
| C2  | C1  | C26 | C17 | 170.55(13)  | C15 | C16 | C17 | C26 | -150.52(14) |
| C2  | C1  | C26 | C25 | -14.5(2)    | C16 | C7  | C8  | C9  | 5.6(2)      |
| C2  | C3  | C4  | C5  | -3.7(2)     | C16 | C17 | C18 | C19 | 18.1(2)     |
| C3  | C4  | C5  | O2  | -167.83(16) | C16 | C17 | C18 | C23 | -170.05(14) |
| C3  | C4  | C5  | C6  | 7.6(2)      | C16 | C17 | C26 | C1  | -14.8(2)    |
| C4  | C5  | C6  | C1  | -15.6(2)    | C16 | C17 | C26 | C25 | 170.13(13)  |
| C4  | C5  | C6  | C7  | 163.51(14)  | C17 | C18 | C19 | C20 | 175.91(15)  |
| C5  | C6  | C7  | C8  | -9.1(2)     | C17 | C18 | C23 | C22 | -178.76(14) |
| C5  | C6  | C7  | C16 | 174.75(13)  | C17 | C18 | C23 | C24 | -4.4(2)     |
| C6  | C1  | C2  | O1  | 160.08(15)  | C18 | C17 | C26 | C1  | 161.23(13)  |
| C6  | C1  | C2  | C3  | -15.2(2)    | C18 | C17 | C26 | C25 | -13.8(2)    |
| C6  | C1  | C26 | C17 | -8.9(2)     | C18 | C19 | C20 | C21 | 0.7(2)      |
| C6  | C1  | C26 | C25 | 166.02(14)  | C18 | C23 | C24 | C25 | -6.0(2)     |
| C6  | C7  | C8  | C9  | -170.53(14) | C19 | C18 | C23 | C22 | -6.5(2)     |
| C6  | C7  | C16 | C15 | 161.00(13)  | C19 | C18 | C23 | C24 | 167.93(14)  |
| C6  | C7  | C16 | C17 | -17.6(2)    | C19 | C20 | C21 | C22 | -2.8(2)     |
| C7  | C8  | C9  | C10 | 5.6(2)      | C20 | C21 | C22 | C23 | 0.2(3)      |
| C7  | C16 | C17 | C18 | -147.85(14) | C21 | C22 | C23 | C18 | 4.5(2)      |
| C7  | C16 | C17 | C26 | 28.0(2)     | C21 | C22 | C23 | C24 | -169.78(16) |
| C8  | C7  | C16 | C15 | -15.3(2)    | C22 | C23 | C24 | C25 | 168.38(15)  |
| C8  | C7  | C16 | C17 | 166.12(13)  | C23 | C18 | C19 | C20 | 3.9(2)      |
| C8  | C9  | C10 | C11 | 170.99(15)  | C23 | C24 | C25 | C26 | 6.4(2)      |
| C8  | C9  | C10 | C15 | -6.8(2)     | C24 | C25 | C26 | C1  | -171.15(15) |
| C9  | C10 | C11 | C12 | -176.13(15) | C24 | C25 | C26 | C17 | 3.8(2)      |
| C9  | C10 | C15 | C14 | 172.12(14)  | C26 | C1  | C2  | O1  | -19.4(2)    |
| C9  | C10 | C15 | C16 | -3.2(2)     | C26 | C1  | C2  | C3  | 165.37(14)  |
| C10 | C11 | C12 | C13 | 3.1(2)      | C26 | C1  | C6  | C5  | -161.32(13) |
| C10 | C15 | C16 | C7  | 14.2(2)     | C26 | C1  | C6  | C7  | 19.6(2)     |
| C10 | C15 | C16 | C17 | -167.32(13) | C26 | C17 | C18 | C19 | -157.71(14) |
| C11 | C10 | C15 | C14 | -5.7(2)     | C26 | C17 | C18 | C23 | 14.1(2)     |
| C11 | C10 | C15 | C16 | 178.98(14)  |     |     |     |     |             |

**Table S6** Hydrogen Atom Coordinates ( $\text{\AA}\times 10^4$ ) and Isotropic Displacement Parameters ( $\text{\AA}^2\times 10^3$ ) for compound **1**.

| Atom | <i>x</i> | <i>y</i> | <i>z</i> | U(eq) |
|------|----------|----------|----------|-------|
| H3   | 4478     | 631      | 521      | 25    |
| H4   | 5593     | 1619     | 73       | 24    |
| H8   | 9242     | 1326     | 234      | 19    |
| H9   | 11066    | 652      | 307      | 21    |
| H11  | 12525    | -939     | 651      | 24    |
| H12  | 13132    | -2322    | 1177     | 27    |
| H13  | 11900    | -2812    | 1661     | 25    |
| H14  | 10135    | -1663    | 1639     | 20    |
| H19  | 10412    | 1847     | 1644     | 20    |
| H20  | 10969    | 2733     | 2217     | 24    |
| H21  | 9796     | 2364     | 2722     | 29    |
| H22  | 8031     | 1290     | 2637     | 26    |
| H24  | 6524     | 405      | 2224     | 21    |
| H25  | 5819     | 277      | 1647     | 19    |

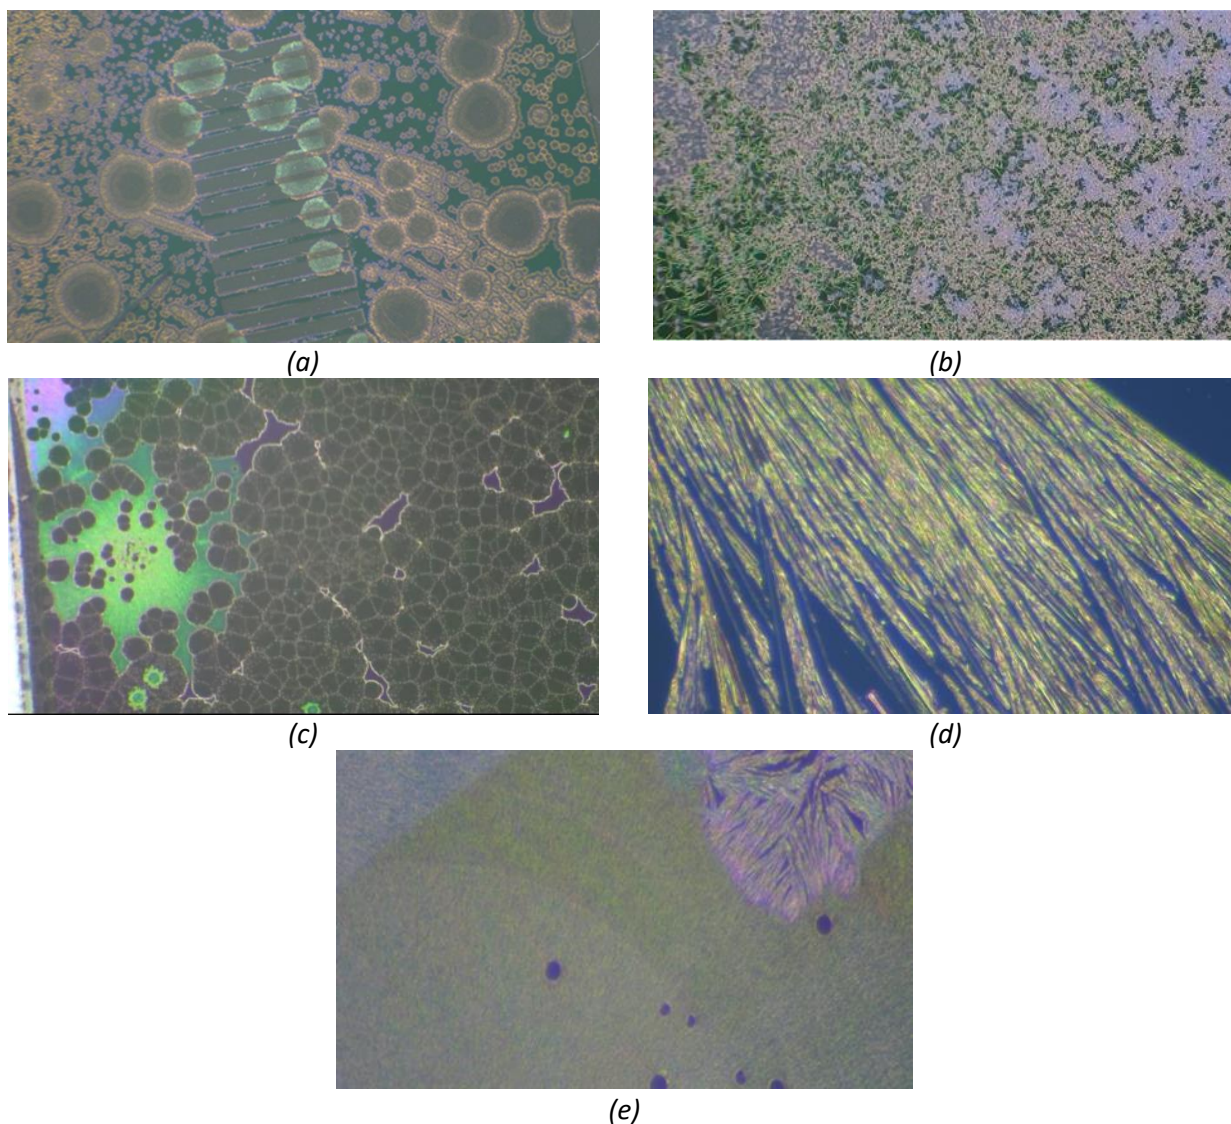

**Figure S1.** Microscopic view of thin films obtained by (a) SC from chlorobenzene onto bare  $\text{SiO}_2$  (not annealed); (b) SC from dichlorobenzene onto bare  $\text{SiO}_2$  (annealed at  $150^\circ\text{C}$ ); (c) SC from dichlorobenzene onto bare PVP (annealed at  $150^\circ\text{C}$ ); (d) DC from chlorobenzene onto bare  $\text{SiO}_2$  (annealed at  $130^\circ\text{C}$ ;  $T_D = 100^\circ\text{C}$ ) and (e) onto PS brush (annealed at  $150^\circ\text{C}$ ;  $T_D = 70^\circ\text{C}$ )
